# Supplementary material for: Childhood overeating is associated with adverse cardiometabolic and inflammatory profiles in adolescence
Source: PubMed Central journal article supplement (PMC8203659; doi:10.1038/s41598-021-90644-2), 2021-06-14
Supplement: 41598_2021_90644_MOESM2_ESM.pdf [file 41598_2021_90644_MOESM2_ESM.pdf]

## Supplementary Methods and Figures

### **Childhood overeating is associated with adverse cardiometabolic and inflammatory profiles in adolescence**

Authors: Christopher Hübel<sup>1,2,3,4\*</sup>, Moritz Herle<sup>5\*</sup>, Diana L. Santos Ferreira<sup>6,7</sup>, Mohamed Abdulkadir<sup>8,9</sup>, Rachel Bryant-Waugh<sup>10</sup>, Ruth J. F. Loos<sup>11</sup>, Cynthia M. Bulik<sup>4,12,13</sup>, Deborah A. Lawlor<sup>6,7</sup>, Nadia Micali<sup>8,9,14,15</sup>

<sup>1</sup>Social, Genetic & Developmental Psychiatry Centre, Institute of Psychiatry, Psychology & Neuroscience, King's College London, UK

<sup>2</sup>UK National Institute for Health Research (NIHR) Biomedical Research Centre for Mental Health, South London and Maudsley Hospital, London, UK

<sup>3</sup>National Centre for Register-based Research, Department of Economics and Business Economics, Aarhus University, Aarhus, Denmark

<sup>4</sup>Department of Medical Epidemiology and Biostatistics, Karolinska Institutet, Stockholm, Sweden

<sup>5</sup>Department of Biostatistics & Health Informatics, Institute of Psychiatry, Psychology & Neuroscience, King's College London, UK

<sup>6</sup>Medical Research Council Integrative Epidemiology Unit at the University of Bristol, Bristol, UK

<sup>7</sup>Population Health Sciences, Bristol Medical School, University of Bristol, Bristol, UK

<sup>8</sup>Department of Pediatrics Gynaecology and Obstetrics, Faculty of Medicine, University of Geneva, Geneva, Switzerland

<sup>9</sup>Department of Psychiatry, Faculty of Medicine, University of Geneva, Geneva, Switzerland

<sup>10</sup>Maudsley Centre for Child and Adolescent Eating Disorders, Michael Rutter Centre for Children and Young People, Maudsley Hospital, London, UK

<sup>11</sup>Icahn School of Medicine at Mount Sinai, New York, New York, USA

<sup>12</sup>Department of Psychiatry, University of North Carolina at Chapel Hill, Chapel Hill, NC, USA

<sup>13</sup>Department of Nutrition, University of North Carolina at Chapel Hill, Chapel Hill, NC, USA

<sup>14</sup>Bristol National Institute of Health Research Biomedical Research Centre, Bristol, UK

<sup>15</sup>Great Ormond Street Institute of Child Health, University College London, London, UK

## **Content**

**Supplementary Figure 1a-c.** Lipoprotein subclasses of the overeating analysis

**Supplementary Figure 2a-c.** Lipoprotein subclasses of the undereating analysis

**Supplementary Figure 3a-c.** Lipoprotein subclasses of the fussy eating analysis

**Supplementary Figure 4.** Conceptual diagram for mediation analyses

## **Supplementary Methods**

**Lipoprotein subclasses and fatty acids details**

**LIPO window**

**Supplementary Table S5.** NMR metabolic measures

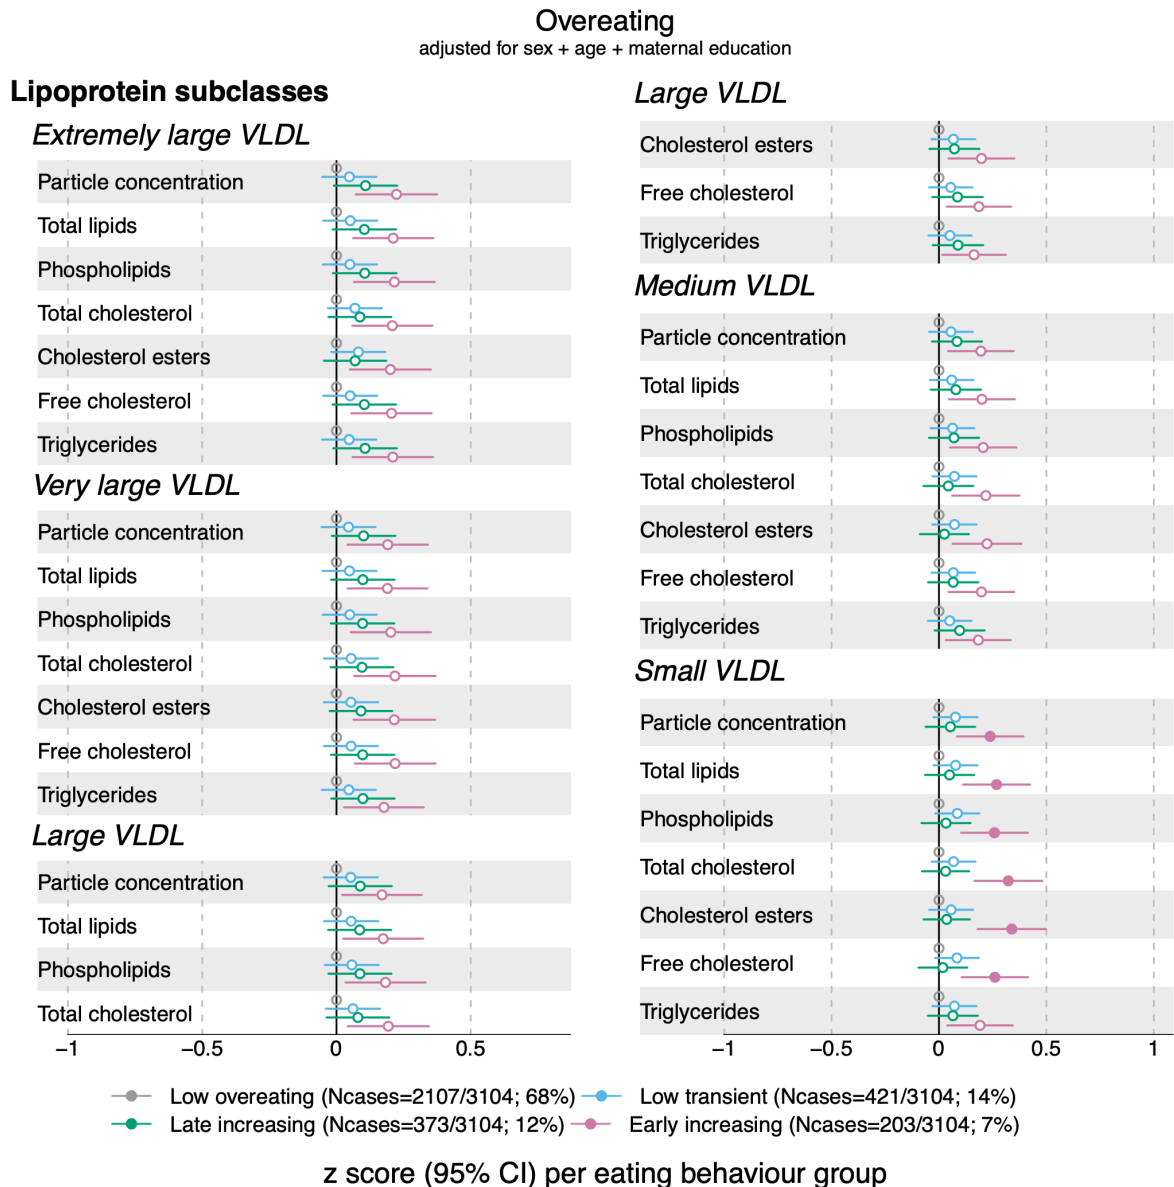

**Supplementary Figure 1a.** Estimates refer to change in standardised metabolic trait concentration at 16 years in each overeating trajectory, in reference to the “low overeating” trajectory (gray dot). Error bars = 95% confidence intervals (CI). Analyses adjusted for sex, age at metabolite measure and maternal education. Note: Association where CIs do not cross 0,  $p$ -value  $<0.05$ ; Filled dots: Association meets the  $p$ -value threshold of  $<0.003$

VLDL = very low-density lipoprotein

**Overeating**  
adjusted for sex + age + maternal education

**Lipoprotein subclasses**

*Very Small VLDL*

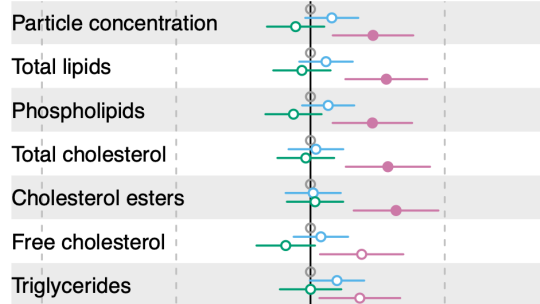

*IDL*

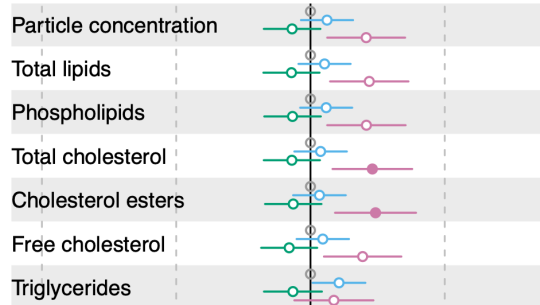

*Large LDL*

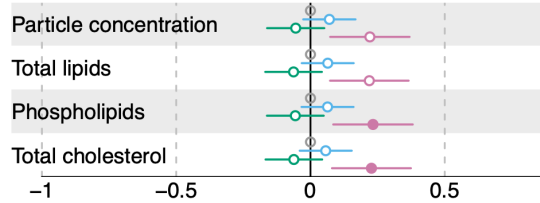

*Large LDL*

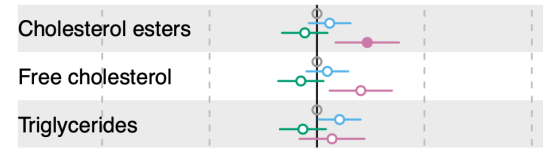

*Medium LDL*

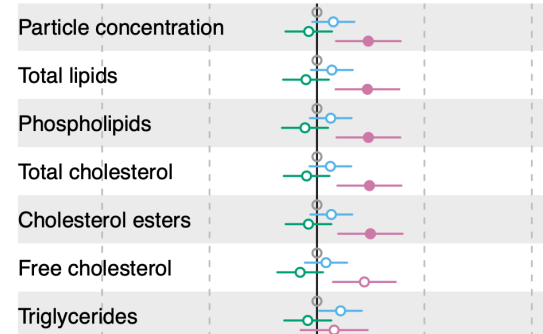

*Small LDL*

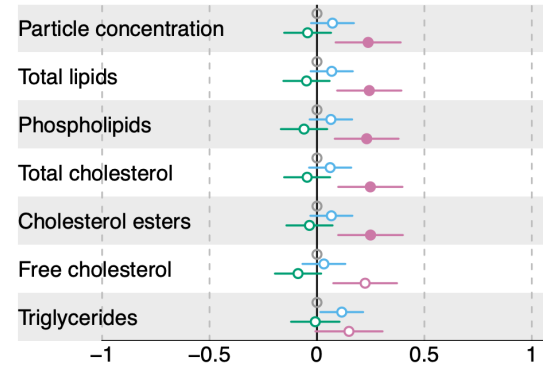

● Low overeating (Ncases=2107/3104; 68%)   
 ● Low transient (Ncases=421/3104; 14%)  
● Late increasing (Ncases=373/3104; 12%)   
 ● Early increasing (Ncases=203/3104; 7%)

z score (95% CI) per eating behaviour group

**Supplementary Figure 1b.** Estimates refer to change in standardised metabolic trait concentration at 16 years in each overeating trajectory, in reference to the “low overeating” trajectory (gray dot). Error bars = 95% confidence intervals (CI). Analyses adjusted for sex, age at metabolite measure and maternal education. Note: Association where CIs do not cross 0, p-value <0.05; Filled dots: Association meets the p-value threshold of <0.003

VLDL = very low-density lipoprotein, IDL = intermediate-density lipoprotein, LDL = low-density lipoprotein

**Overeating**  
adjusted for sex + age + maternal education

**Lipoprotein subclasses**

*Very large HDL*

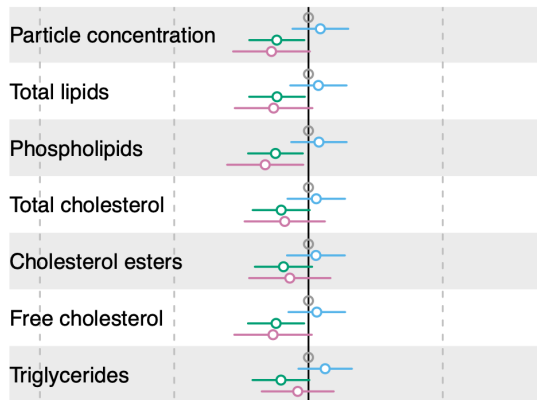

*Large HDL*

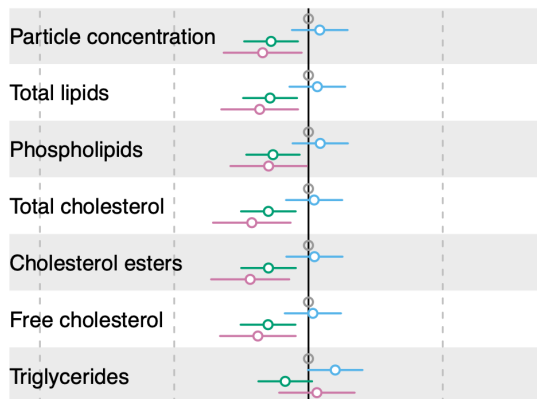

*Medium HDL*

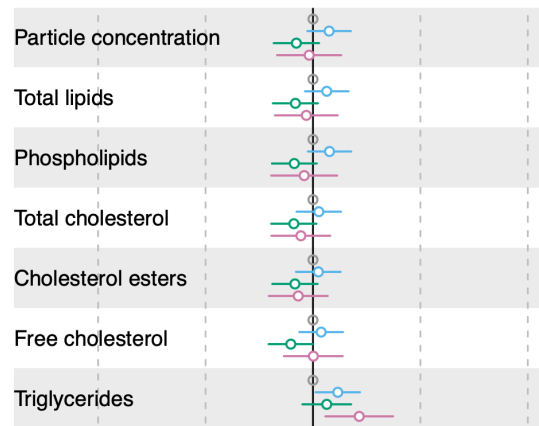

*Small HDL*

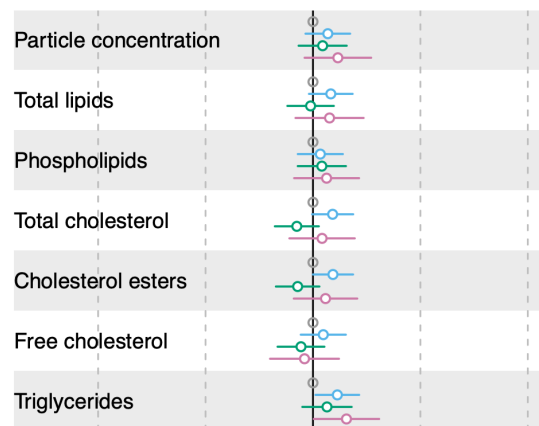

● Low overeating (Ncases=2107/3104; 68%)   
 ● Low transient (Ncases=421/3104; 14%)  
● Late increasing (Ncases=373/3104; 12%)   
 ● Early increasing (Ncases=203/3104; 7%)

z score (95% CI) per eating behaviour group

**Supplementary Figure 1c.** Estimates refer to change in standardised metabolic trait concentration at 16 years in each overeating trajectory, in reference to the “low overeating” trajectory (gray dot). Error bars = 95% confidence intervals (CI). Analyses adjusted for sex, age at metabolite measure and maternal education. Note: Association where CIs do not cross 0,  $p$ -value  $<0.05$ ; Filled dots: Association meets the  $p$ -value threshold of  $<0.003$ .

HDL = high-density lipoprotein

**Undereating**  
adjusted for sex + age + maternal education

**Lipoprotein subclasses**

*Extremely large VLDL*

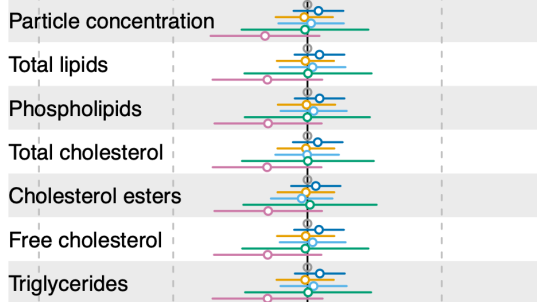

*Very large VLDL*

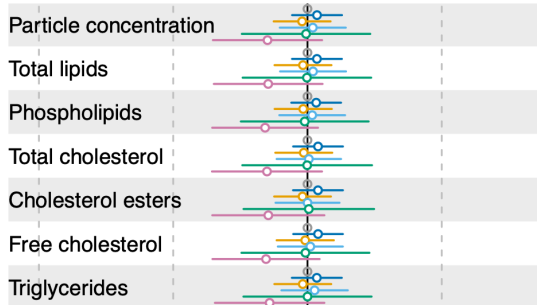

*Large VLDL*

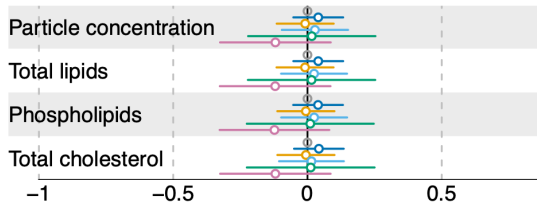

*Large VLDL*

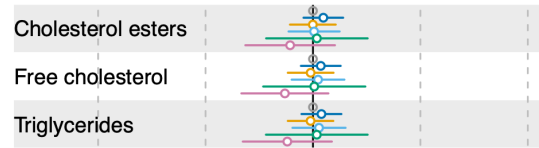

*Medium VLDL*

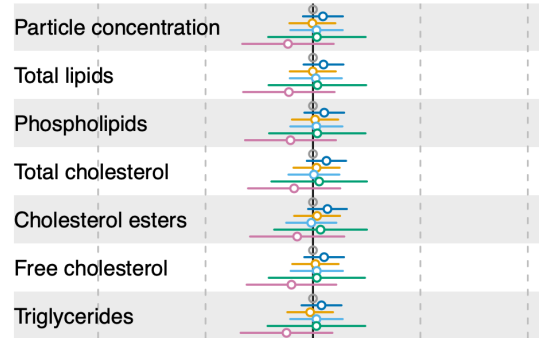

*Small VLDL*

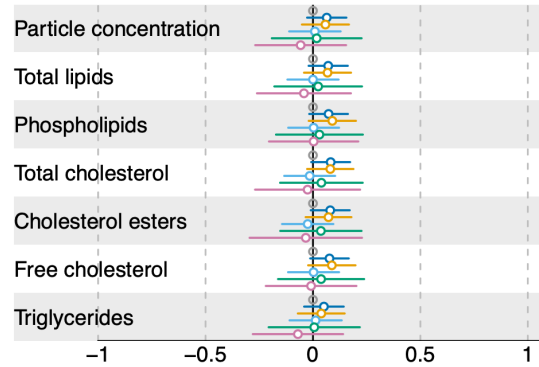

● Low undereating (Ncases=790/3104; 25%)   
 ● Low transient (Ncases=1169/3104; 38%)  
● Low & decreasing (Ncases=599/3104; 19%)   
 ● High transient (Ncases=390/3104; 13%)  
● High decreasing (Ncases=104/3104; 3%)   
 ● High persistent (Ncases=52/3104; 2%)  
 z score (95% CI) per eating behaviour group

**Supplementary Figure 2a.** Estimates refer to change in standardised metabolic trait concentration at 16 years in each undereating trajectory, in reference to the “low undereating” trajectory (gray dot). Error bars = 95% confidence intervals (CI). Analyses adjusted for sex, age at metabolite measure and maternal education. Note: Association where CIs do not cross 0,  $p$ -value  $<0.05$ ; Filled dots: Association meets the  $p$ -value threshold of  $<0.003$

VLDL = very low-density lipoprotein

**Undereating**  
adjusted for sex + age + maternal education

**Lipoprotein subclasses**

*Very Small VLDL*

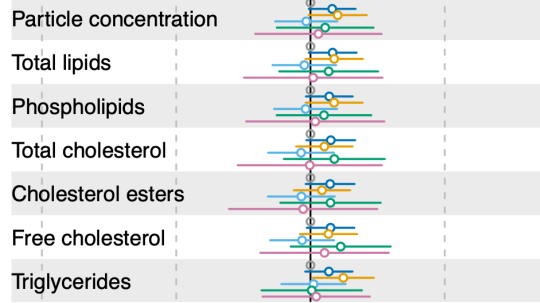

*IDL*

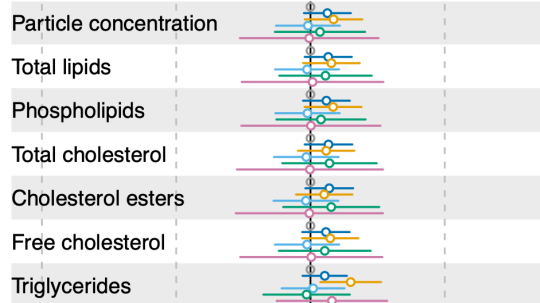

*Large LDL*

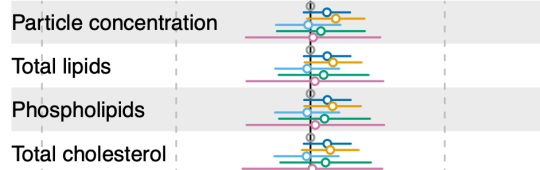

*Large LDL*

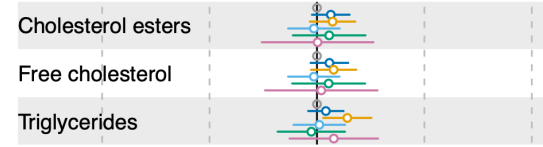

*Medium LDL*

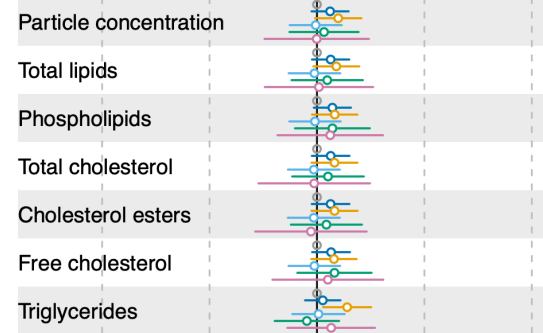

*Small LDL*

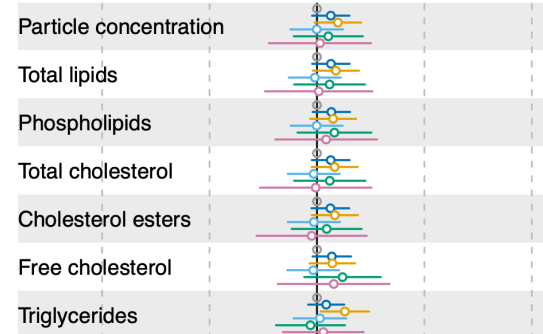

● Low undereating (Ncases=790/3104; 25%)   
 ● Low transient (Ncases=1169/3104; 38%)  
● Low & decreasing (Ncases=599/3104; 19%)   
 ● High transient (Ncases=390/3104; 13%)  
● High decreasing (Ncases=104/3104; 3%)   
 ● High persistent (Ncases=52/3104; 2%)  
 z score (95% CI) per eating behaviour group

**Supplementary Figure 2b.** Estimates refer to change in standardised metabolic trait concentration at 16 years in each undereating trajectory, in reference to the “low undereating” trajectory (gray dot). Error bars = 95% confidence intervals (CI). Analyses adjusted for sex, age at metabolite measure and maternal education. Note: Association where CIs do not cross 0,  $p$ -value  $<0.05$ ; Filled dots: Association meets the  $p$ -value threshold of  $<0.003$

VLDL = very low-density lipoprotein, IDL = intermediate-density lipoprotein, LDL = low-density lipoprotein

**Undereating**  
adjusted for sex + age + maternal education

**Lipoprotein subclasses**

*Very large HDL*

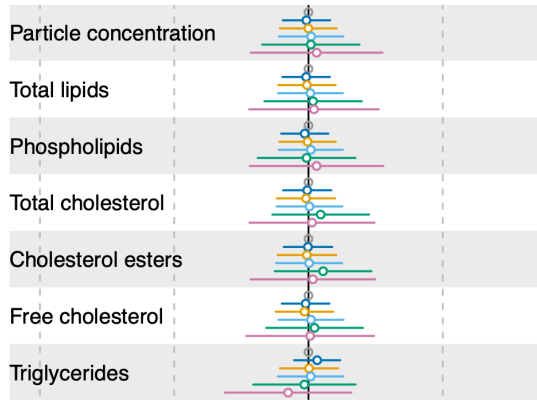

*Large HDL*

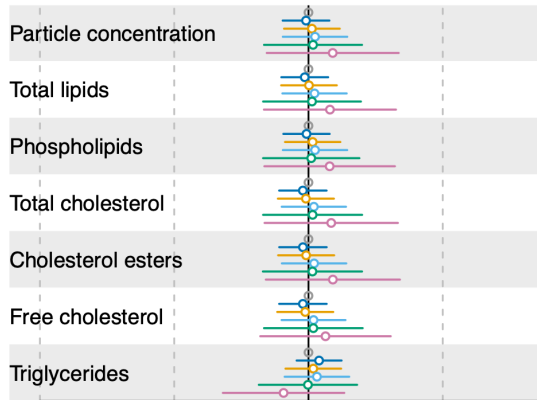

*Medium HDL*

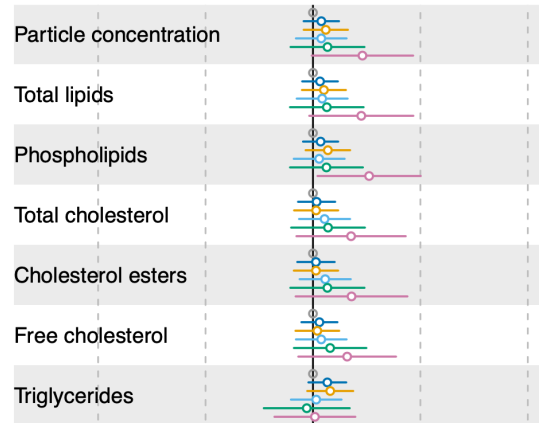

*Small HDL*

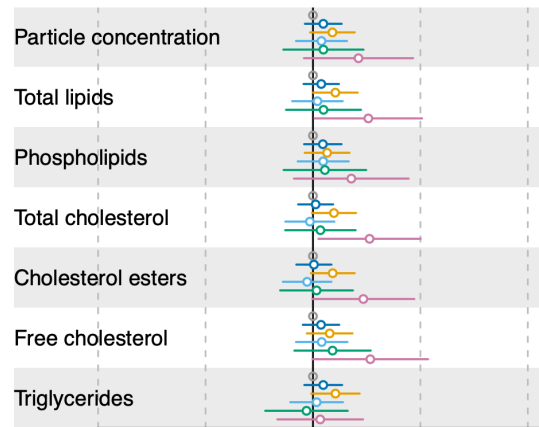

● Low undereating (Ncases=790/3104; 25%)   
 ● Low transient (Ncases=1169/3104; 38%)  
● Low & decreasing (Ncases=599/3104; 19%)   
 ● High transient (Ncases=390/3104; 13%)  
● High decreasing (Ncases=104/3104; 3%)   
 ● High persistent (Ncases=52/3104; 2%)  
 z score (95% CI) per eating behaviour group

**Supplementary Figure 2c.** Estimates refer to change in standardised metabolic trait concentration at 16 years in each undereating trajectory, in reference to the “low undereating” trajectory (gray dot). Error bars = 95% confidence intervals (CI). Analyses adjusted for sex, age at metabolite measure and maternal education. Note: Association where CIs do not cross 0, p-value <0.05; Filled dots: Association meets the p-value threshold of <0.003

HDL = high-density lipoprotein



**Fussy eating**  
adjusted for sex + age + maternal education

**Lipoprotein subclasses**

*Extremely large VLDL*

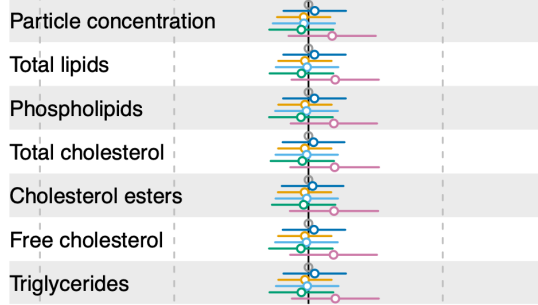

*Very large VLDL*

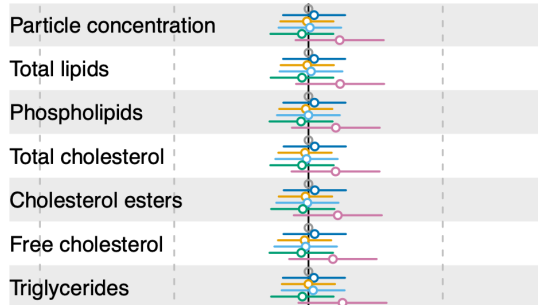

*Large VLDL*

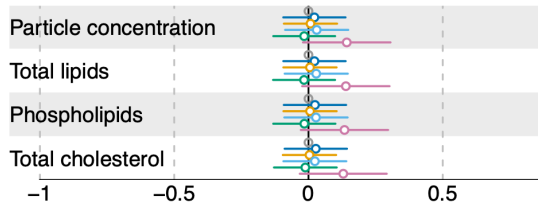

*Large VLDL*

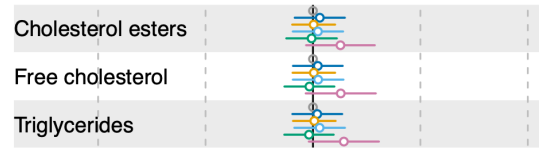

*Medium VLDL*

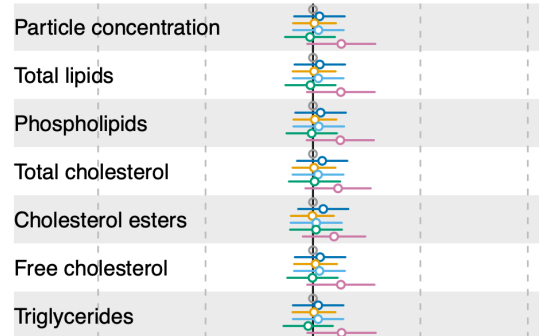

*Small VLDL*

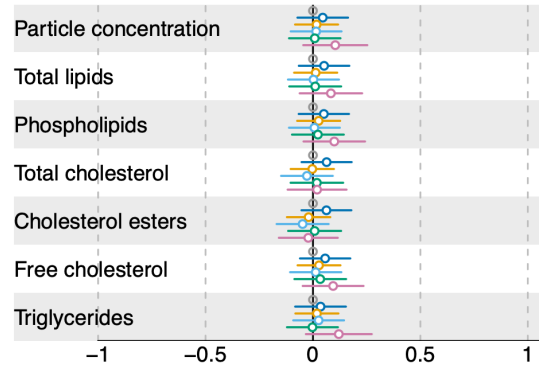

● Low fussy eating (Ncases=713/3107; 23%)   
 ● Low & decreasing (Ncases=460/3107; 15%)  
● Low & transient (Ncases=840/3107; 27%)   
 ● High & decreasing (Ncases=429/3107; 14%)  
● Low increasing (Ncases=401/3107; 13%)   
 ● High persistent (Ncases=264/3107; 8%)  
 z score (95% CI) per eating behaviour group

**Supplementary Figure 3a.** Estimates refer to change in standardised metabolic trait concentration at 16 years in each fussy eating trajectory, in reference to the “low fussy eating” trajectory (gray dot). Error bars = 95% confidence intervals (CI). Analyses adjusted for sex, age at metabolite measure and maternal education. Note: Association where CIs do not cross 0,  $p$ -value  $<0.05$ ; Filled dots: Association meets the  $p$ -value threshold of  $<0.003$

VLDL = very low-density lipoprotein

**Fussy eating**  
adjusted for sex + age + maternal education

**Lipoprotein subclasses**

*Very Small VLDL*

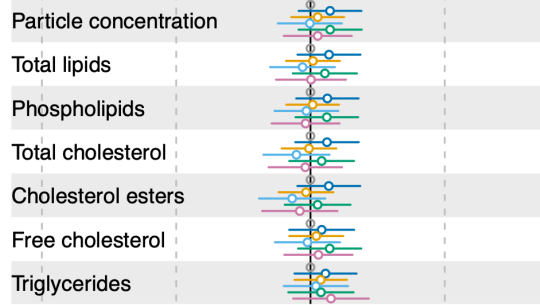

*IDL*

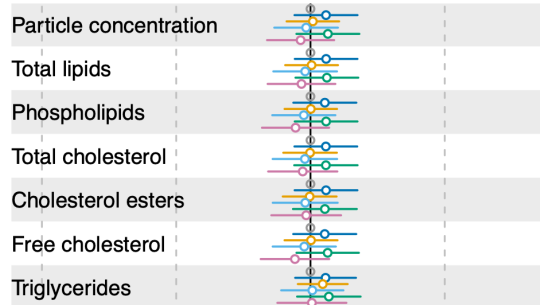

*Large LDL*

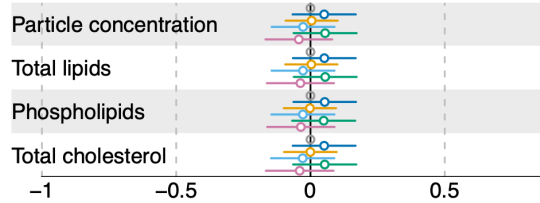

*Large LDL*

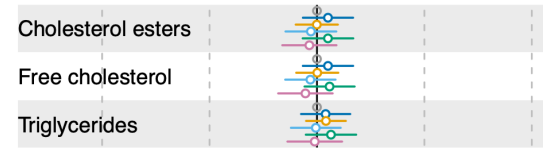

*Medium LDL*

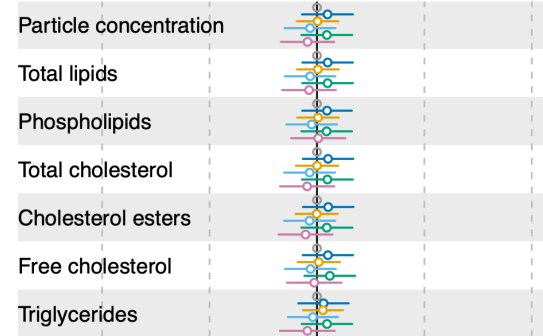

*Small LDL*

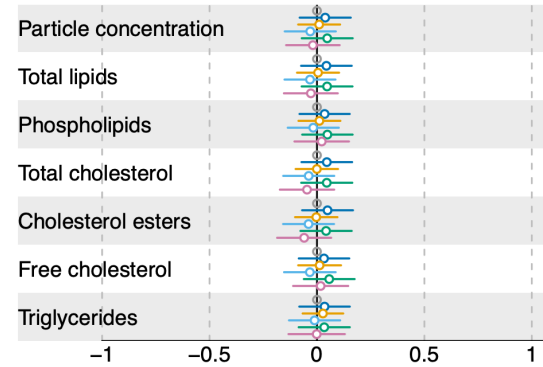

● Low fussy eating (Ncases=713/3107; 23%)   
 ● Low & decreasing (Ncases=460/3107; 15%)  
● Low & transient (Ncases=840/3107; 27%)   
 ● High & decreasing (Ncases=429/3107; 14%)  
● Low increasing (Ncases=401/3107; 13%)   
 ● High persistent (Ncases=264/3107; 8%)  
 z score (95% CI) per eating behaviour group

**Supplementary Figure 3b.** Estimates refer to change in standardised metabolic trait concentration at 16 years in each fussy eating trajectory, in reference to the “low fussy eating” trajectory (gray dot). Error bars = 95% confidence intervals (CI). Analyses adjusted for sex, age at metabolite measure and maternal education. Note: Association where CIs do not cross 0,  $p$ -value  $<0.05$ ; Filled dots: Association meets the  $p$ -value threshold of  $<0.003$

VLDL = very low-density lipoprotein, IDL = intermediate-density lipoprotein, LDL = low-density lipoprotein

**Fussy eating**  
adjusted for sex + age + maternal education

**Lipoprotein subclasses**

*Very large HDL*

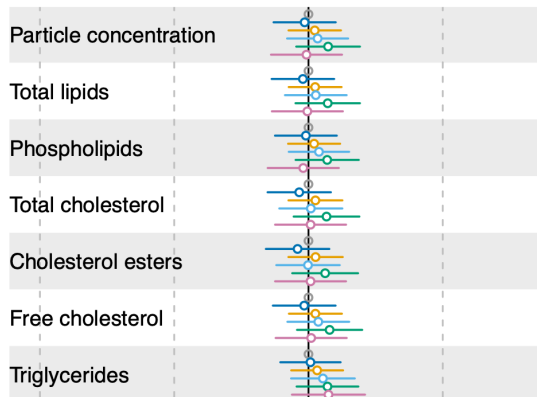

*Large HDL*

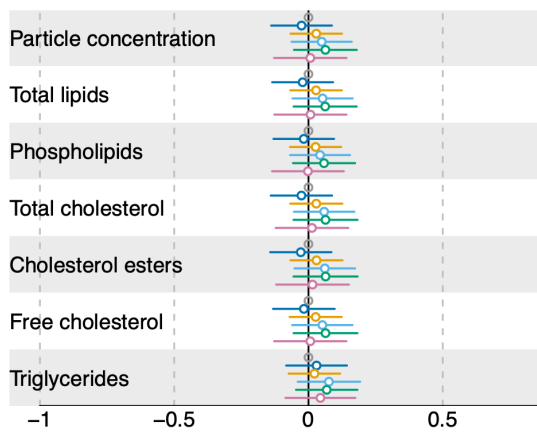

*Medium HDL*

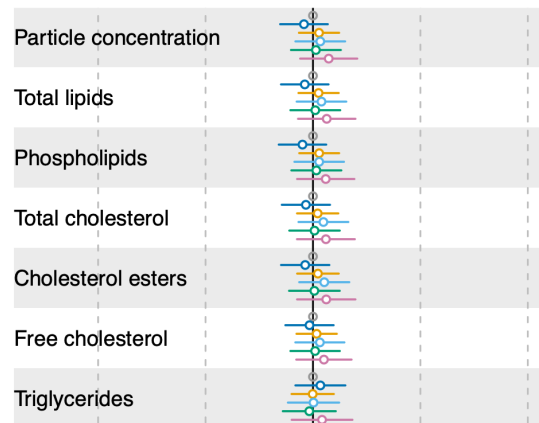

*Small HDL*

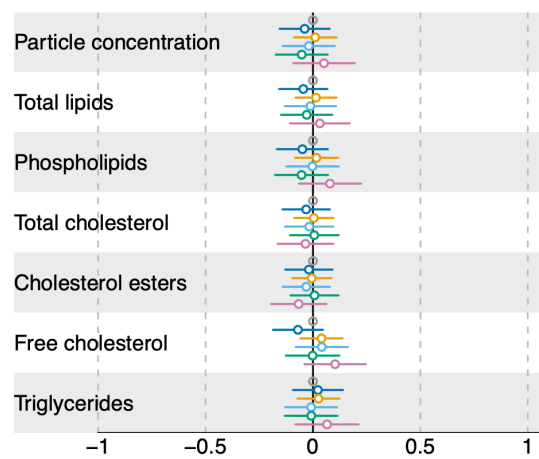

● Low fussy eating (Ncases=713/3107; 23%)    ● Low & decreasing (Ncases=460/3107; 15%)  
 ● Low & transient (Ncases=840/3107; 27%)    ● High & decreasing (Ncases=429/3107; 14%)  
 ● Low increasing (Ncases=401/3107; 13%)    ● High persistent (Ncases=264/3107; 8%)  
 z score (95% CI) per eating behaviour group

**Supplementary Figure 3c.** Estimates refer to change in standardised metabolic trait concentration at 16 years in each fussy eating trajectory, in reference to the “low fussy eating” trajectory (gray dot). Error bars = 95% confidence intervals (CI). Analyses adjusted for sex, age at metabolite measure and maternal education. Note: Association where CIs do not cross 0,  $p$ -value  $<0.05$ ; Filled dots: Association meets the  $p$ -value threshold of  $<0.003$

HDL = high-density lipoprotein

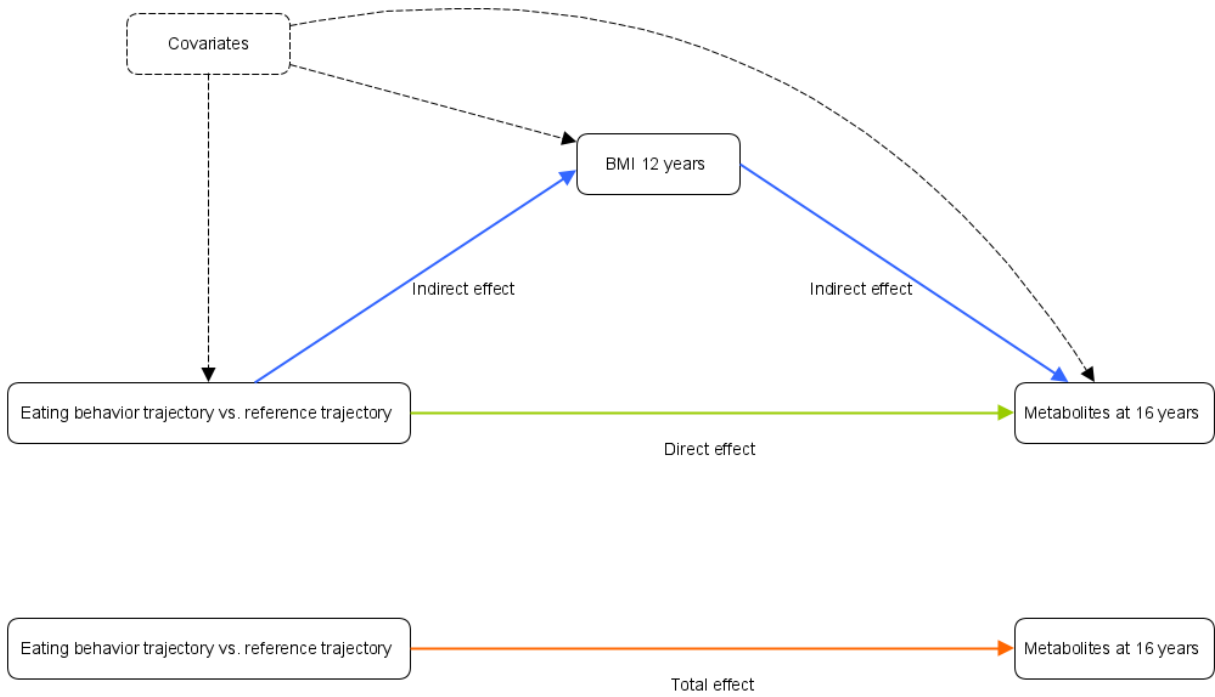

**Supplementary Figure 4.** Conceptual diagram for mediation analyses illustrating direct, indirect, and total association.

## Supplementary Methods

### Lipoprotein subclasses and fatty acids details

Each lipoprotein measurement is characterized by three elements: size (e.g., extremely large, very large, large, medium, small, very small), density (e.g., very low density lipoprotein [VLDL], intermediate density lipoprotein [IDL], low density lipoprotein [LDL], high density lipoprotein [HDL]) and trait (e.g., particle concentration, total lipids, triglycerides, phospholipids, total cholesterol, cholesterol esters, free cholesterol). The definition of the 14 lipoprotein subclass are as follows: six subclasses of VLDL: extremely large VLDL (particle diameters from 75 nm upwards and possible chylomicrons contributions), alongside 5 other VLDL subclasses (average particle diameters of 64.0 nm, 53.6 nm, 44.5 nm, 36.8 nm, and 31.3 nm); IDL (28.6 nm), 3 LDL subclasses (25.5 nm, 23.0 nm, and 18.7 nm), and 4 HDL subclasses (14.3 nm, 12.1 nm, 10.9 nm, and 8.7 nm). The lipoprotein traits obtained are the concentration of the lipoprotein size-density-trait combination in the total serum sample. For example, 0.5 mmol/l of very large VLDL cholesterol means 0.5 mmol of cholesterol embedded in very large VLDL particles per liter of serum or EDTA plasma. Remnant cholesterol was defined as VLDL cholesterol + IDL cholesterol, which is equivalent to total cholesterol (HDL cholesterol + LDL cholesterol)<sup>1</sup>. For fatty acids (FA), only the cis configuration was quantified since the trans fatty acids are below the platform's detection limit<sup>1</sup>.

### LIPO window

The LIPO window represents a standard spectrum of human serum displaying broad overlapping resonances arising from lipid molecules in various lipoprotein particles. The LIPO data are recorded using 8 transients acquired using a NOESY-presat pulse sequence with mixing time of 10ms and water peak suppression. The LMWM window includes signals from various low-molecular-weight molecules. The LMWM spectrum is recorded using a relaxation-filtered pulse sequence that suppresses most of the broad macromolecule and lipid signals to enhance detection of small solutes. Specifically, a Carr-Purcell-Meiboom-Gill (CPMG) pulse sequence with a 78ms T<sub>2</sub>-filter and fixed echo delay of 403μs is applied using 24 transients. The LIPID window of the serum extracts is acquired with a standard 1D spectrum using 32 transients.

**Table S5: NMR metabolic measures**

| <b>Molecular class</b>      | <b>Lipid, lipoprotein or metabolite name</b>                            | <b>Units</b>  |
|-----------------------------|-------------------------------------------------------------------------|---------------|
| <b>Extremely large VLDL</b> | <i>Concentration of chylomicrons and extremely large VLDL particles</i> | <i>mol/l</i>  |
|                             | <i>Total lipids in chylomicrons and extremely large VLDL</i>            | <i>mmol/l</i> |
|                             | <i>Phospholipids in chylomicrons and extremely large VLDL</i>           | <i>mmol/l</i> |
|                             | <i>Total cholesterol in chylomicrons and extremely large VLDL</i>       | <i>mmol/l</i> |
|                             | <i>Free cholesterol in chylomicrons and extremely large VLDL</i>        | <i>mmol/l</i> |
|                             | <i>Triglycerides in chylomicrons and extremely large VLDL</i>           | <i>mmol/l</i> |
| <b>Very large VLDL</b>      | <i>Concentration of very large VLDL particles</i>                       | <i>mol/l</i>  |
|                             | <i>Total lipids in very large VLDL</i>                                  | <i>mmol/l</i> |
|                             | <i>Phospholipids in very large VLDL</i>                                 | <i>mmol/l</i> |
|                             | <i>Total cholesterol in very large VLDL</i>                             | <i>mmol/l</i> |
|                             | <i>Cholesterol esters in very large VLDL</i>                            | <i>mmol/l</i> |
|                             | <i>Free cholesterol in very large VLDL</i>                              | <i>mmol/l</i> |
|                             | <i>Triglycerides in very large VLDL</i>                                 | <i>mmol/l</i> |
| <b>Large VLDL</b>           | <i>Concentration of large VLDL particles</i>                            | <i>mol/l</i>  |

|                    |                                                   |               |
|--------------------|---------------------------------------------------|---------------|
|                    | <i>Total lipids in large VLDL</i>                 | <i>mmol/l</i> |
|                    | <i>Phospholipids in large VLDL</i>                | <i>mmol/l</i> |
|                    | <i>Total cholesterol in large VLDL</i>            | <i>mmol/l</i> |
|                    | <i>Cholesterol esters in large VLDL</i>           | <i>mmol/l</i> |
|                    | <i>Free cholesterol in large VLDL</i>             | <i>mmol/l</i> |
|                    | <i>Triglycerides in large VLDL</i>                | <i>mmol/l</i> |
| <hr/>              |                                                   |               |
| <b>Medium VLDL</b> | <i>Concentration of large VLDL particles</i>      | <i>mol/l</i>  |
|                    | <i>Total lipids in small VLDL</i>                 | <i>mmol/l</i> |
|                    | <i>Phospholipids in small VLDL</i>                | <i>mmol/l</i> |
|                    | <i>Total cholesterol in small VLDL</i>            | <i>mmol/l</i> |
|                    | <i>Cholesterol esters in small VLDL</i>           | <i>mmol/l</i> |
|                    | <i>Free cholesterol in small VLDL</i>             | <i>mmol/l</i> |
|                    | <i>Triglycerides in small VLDL</i>                | <i>mmol/l</i> |
| <hr/>              |                                                   |               |
| <b>Small VLDL</b>  | <i>Concentration of very small VLDL particles</i> | <i>mol/l</i>  |
|                    | <i>Total lipids in very small VLDL</i>            | <i>mmol/l</i> |
|                    | <i>Phospholipids in very small VLDL</i>           | <i>mmol/l</i> |
|                    | <i>Total cholesterol in very small VLDL</i>       | <i>mmol/l</i> |
|                    | <i>Cholesterol esters in very small VLDL</i>      | <i>mmol/l</i> |
|                    | <i>Free cholesterol in very small VLDL</i>        | <i>mmol/l</i> |
| <hr/>              |                                                   |               |

|                   |                                              |               |
|-------------------|----------------------------------------------|---------------|
|                   | <i>Triglycerides in very small VLDL</i>      | <i>mmol/l</i> |
| <b>IDI</b>        | <i>Concentration of IDL particles</i>        | <i>mol/l</i>  |
|                   | <i>Total lipids in IDL</i>                   | <i>mmol/l</i> |
|                   | <i>Phospholipids in IDL</i>                  | <i>mmol/l</i> |
|                   | <i>Total cholesterol in IDL</i>              | <i>mmol/l</i> |
|                   | <i>Cholesterol esters in IDL</i>             | <i>mmol/l</i> |
|                   | <i>Free cholesterol in IDL</i>               | <i>mmol/l</i> |
|                   | <i>Triglycerides in IDL</i>                  | <i>mmol/l</i> |
|                   | <i>Concentration of large LDL particles</i>  | <i>mol/l</i>  |
| <b>Large LDL</b>  | <i>Total lipids in large LDL</i>             | <i>mmol/l</i> |
|                   | <i>Phospholipids in large LDL</i>            | <i>mmol/l</i> |
|                   | <i>Total cholesterol in large LDL</i>        | <i>mmol/l</i> |
|                   | <i>Cholesterol esters in large LDL</i>       | <i>mmol/l</i> |
|                   | <i>Free cholesterol in large LDL</i>         | <i>mmol/l</i> |
|                   | <i>Triglycerides in large LDL</i>            | <i>mmol/l</i> |
| <b>Medium LDL</b> | <i>Concentration of medium LDL particles</i> | <i>mol/l</i>  |
|                   | <i>Total lipids in medium LDL</i>            | <i>mmol/l</i> |
|                   | <i>Phospholipids in medium LDL</i>           | <i>mmol/l</i> |
|                   | <i>Total cholesterol in medium LDL</i>       | <i>mmol/l</i> |



|                       |                                                  |               |
|-----------------------|--------------------------------------------------|---------------|
|                       | <i>Cholesterol esters in medium LDL</i>          | <i>mmol/l</i> |
|                       | <i>Free cholesterol in medium LDL</i>            | <i>mmol/l</i> |
|                       | <i>Triglycerides in medium LDL</i>               | <i>mmol/l</i> |
| <hr/>                 |                                                  |               |
| <b>Small LDL</b>      | <i>Concentration of small LDL particles</i>      | <i>mol/l</i>  |
|                       | <i>Total lipids in small LDL</i>                 | <i>mmol/l</i> |
|                       | <i>Phospholipids in small LDL</i>                | <i>mmol/l</i> |
|                       | <i>Total cholesterol in small LDL</i>            | <i>mmol/l</i> |
|                       | <i>Cholesterol esters in small LDL</i>           | <i>mmol/l</i> |
|                       | <i>Free cholesterol in small LDL</i>             | <i>mmol/l</i> |
|                       | <i>Triglycerides in small LDL</i>                | <i>mmol/l</i> |
| <hr/>                 |                                                  |               |
| <b>Very large HDL</b> | <i>Concentration of very large HDL particles</i> | <i>mol/l</i>  |
|                       | <i>Total lipids in very large HDL</i>            | <i>mmol/l</i> |
|                       | <i>Phospholipids in very large HDL</i>           | <i>mmol/l</i> |
|                       | <i>Total cholesterol in very large HDL</i>       | <i>mmol/l</i> |
|                       | <i>Cholesterol esters in very large HDL</i>      | <i>mmol/l</i> |
|                       | <i>Free cholesterol in very large HDL</i>        | <i>mmol/l</i> |
|                       | <i>Triglycerides in very large HDL</i>           | <i>mmol/l</i> |
| <hr/>                 |                                                  |               |
| <b>Large HDL</b>      | <i>Concentration of large HDL particles</i>      | <i>mol/l</i>  |
|                       | <i>Total lipids in large HDL</i>                 | <i>mmol/l</i> |
| <hr/>                 |                                                  |               |

|                   |                                              |               |
|-------------------|----------------------------------------------|---------------|
|                   | <i>Phospholipids in large HDL</i>            | <i>mmol/l</i> |
|                   | <i>Total cholesterol in large HDL</i>        | <i>mmol/l</i> |
|                   | <i>Cholesterol esters in large HDL</i>       | <i>mmol/l</i> |
|                   | <i>Free cholesterol in large HDL</i>         | <i>mmol/l</i> |
|                   | <i>Triglycerides in large HDL</i>            | <i>mmol/l</i> |
| <hr/>             |                                              |               |
| <b>Medium HDL</b> | <i>Concentration of medium HDL particles</i> | <i>mol/l</i>  |
|                   | <i>Total lipids in medium HDL</i>            | <i>mmol/l</i> |
|                   | <i>Phospholipids in medium HDL</i>           | <i>mmol/l</i> |
|                   | <i>Total cholesterol in medium HDL</i>       | <i>mmol/l</i> |
|                   | <i>Cholesterol esters in medium HDL</i>      | <i>mmol/l</i> |
|                   | <i>Free cholesterol in medium HDL</i>        | <i>mmol/l</i> |
|                   | <i>Triglycerides in medium HDL</i>           | <i>mmol/l</i> |
| <hr/>             |                                              |               |
| <b>Small HDL</b>  | <i>Concentration of small HDL particles</i>  | <i>mol/l</i>  |
|                   | <i>Total lipids in small HDL</i>             | <i>mmol/l</i> |
|                   | <i>Phospholipids in small HDL</i>            | <i>mmol/l</i> |
|                   | <i>Total cholesterol in small HDL</i>        | <i>mmol/l</i> |
|                   | <i>Cholesterol esters in small HDL</i>       | <i>mmol/l</i> |
|                   | <i>Free cholesterol in small HDL</i>         | <i>mmol/l</i> |
|                   | <i>Triglycerides in small HDL</i>            | <i>mmol/l</i> |
| <hr/>             |                                              |               |

|                                                                               |                                                              |               |
|-------------------------------------------------------------------------------|--------------------------------------------------------------|---------------|
| <b>Lipoprotein<br/>particle size</b>                                          | <i>Mean diameter for VLDL particles</i>                      | <i>nm</i>     |
|                                                                               | <i>Mean diameter for LDL particles</i>                       | <i>nm</i>     |
|                                                                               | <i>Mean diameter for HDL particles</i>                       | <i>nm</i>     |
| <b>Cholesterol<br/>concentrations</b>                                         | <i>Total cholesterol</i>                                     | <i>mmol/l</i> |
|                                                                               | <i>Total cholesterol in VLDL</i>                             | <i>mmol/l</i> |
|                                                                               | <i>Remnant cholesterol (non-HDL and non-LDL cholesterol)</i> | <i>mmol/l</i> |
|                                                                               | <i>Total cholesterol in LDL</i>                              | <i>mmol/l</i> |
|                                                                               | <i>Total cholesterol in HDL</i>                              | <i>mmol/l</i> |
|                                                                               | <i>Total cholesterol in HDL2</i>                             | <i>mmol/l</i> |
|                                                                               | <i>Total cholesterol in HDL3</i>                             | <i>mmol/l</i> |
|                                                                               | <i>Esterified cholesterol</i>                                | <i>mmol/l</i> |
|                                                                               | <i>Free cholesterol</i>                                      | <i>mmol/l</i> |
| <b>Glycerides and<br/>phospholipid<br/>concentrations<br/>(and one ratio)</b> | <i>Total triglycerides</i>                                   | <i>mmol/l</i> |
|                                                                               | <i>Triglycerides in VLDL</i>                                 | <i>mmol/l</i> |
|                                                                               | <i>Triglycerides in LDL</i>                                  | <i>mmol/l</i> |
|                                                                               | <i>Triglycerides in HDL</i>                                  | <i>mmol/l</i> |
|                                                                               | <i>Total phosphoglycerides</i>                               | <i>mmol/l</i> |
|                                                                               | <i>Ratio of triglycerides to phosphoglycerides</i>           |               |
|                                                                               | <i>Phosphatidylcholine and other cholines</i>                | <i>mmol/l</i> |

|                                                             |                                                                  |               |
|-------------------------------------------------------------|------------------------------------------------------------------|---------------|
|                                                             | <i>Sphingomyelins</i>                                            | <i>mmol/l</i> |
|                                                             | <i>Total cholines</i>                                            | <i>mmol/l</i> |
| <hr/>                                                       |                                                                  |               |
|                                                             | <i>Apolipoprotein A-1</i>                                        | <i>g/l</i>    |
| <b><i>Apolipoprotein concentrations (and one ratio)</i></b> | <i>Apolipoprotein B</i>                                          | <i>g/l</i>    |
| <hr/>                                                       |                                                                  |               |
| <b><i>Fatty acid concentrations</i></b>                     | <i>Total fatty acids</i>                                         | <i>mmol/l</i> |
|                                                             | <i>Estimated degree of saturation</i>                            |               |
|                                                             | <i>22:6, docosahexaenoic acid</i>                                | <i>mmol/l</i> |
|                                                             | <i>18:2 linoleic acid</i>                                        | <i>mmol/l</i> |
|                                                             | <i>Omega-3 fatty acids</i>                                       | <i>mmol/l</i> |
|                                                             | <i>Omega-6 fatty acids</i>                                       | <i>mmol/l</i> |
|                                                             | <i>Polyunsaturated fatty acids</i>                               | <i>mmol/l</i> |
|                                                             | <i>Monounsaturated fatty acids; 16:1, 18:1</i>                   | <i>mmol/l</i> |
|                                                             | <i>Saturated fatty acids</i>                                     | <i>mmol/l</i> |
| <hr/>                                                       |                                                                  |               |
| <b><i>Fatty acid ratios</i></b>                             | <i>Ratio of 22:6, docosahexaenoic acid to total fatty acids</i>  | <i>%</i>      |
|                                                             | <i>Ratio of 18:2 linoleic acid to total fatty acids</i>          | <i>%</i>      |
|                                                             | <i>Ratio of omega-3 fatty acids to total fatty acids</i>         | <i>%</i>      |
|                                                             | <i>Ratio of omega-6 fatty acids to total fatty acids</i>         | <i>%</i>      |
|                                                             | <i>Ratio of polyunsaturated fatty acids to total fatty acids</i> | <i>%</i>      |
| <hr/>                                                       |                                                                  |               |

|                                      |                                                                  |               |
|--------------------------------------|------------------------------------------------------------------|---------------|
|                                      | <i>Ratio of monounsaturated fatty acids to total fatty acids</i> | <i>%</i>      |
|                                      | <i>Ratio of saturated fatty acids to total fatty acids</i>       | <i>%</i>      |
| <b>Glycolysis related metabolite</b> | <i>Glucose</i>                                                   | <i>mmol/l</i> |
|                                      | <i>Lactate</i>                                                   | <i>mmol/l</i> |
|                                      | <i>Pyruvate</i>                                                  | <i>mmol/l</i> |
|                                      | <i>Citrate</i>                                                   | <i>mmol/l</i> |
|                                      | <i>Glycerol</i>                                                  | <i>mmol/l</i> |
| <b>Amino acid concentrations</b>     | <i>Alanine</i>                                                   | <i>mmol/l</i> |
|                                      | <i>Glutamine</i>                                                 | <i>mmol/l</i> |
|                                      | <i>Glycine</i>                                                   | <i>mmol/l</i> |
|                                      | <i>Histidine</i>                                                 | <i>mmol/l</i> |
| <i>branched</i>                      | <i>Isoleucine</i>                                                | <i>mmol/l</i> |
| <i>branched</i>                      | <i>Leucine</i>                                                   | <i>mmol/l</i> |
| <i>branched</i>                      | <i>Valine</i>                                                    | <i>mmol/l</i> |
| <i>aromatic</i>                      | <i>Phenylalanine</i>                                             | <i>mmol/l</i> |
| <i>aromatic</i>                      | <i>Tyrosine</i>                                                  | <i>mmol/l</i> |
| <b>Ketone body concentrations</b>    | <i>Acetate</i>                                                   | <i>mmol/l</i> |
|                                      | <i>Acetoacetate</i>                                              | <i>mmol/l</i> |
|                                      | <i>3-hydroxybutyrate</i>                                         | <i>mmol/l</i> |

|                      |                                                   |        |
|----------------------|---------------------------------------------------|--------|
| <b>Fluid balance</b> | Albumin                                           | mmol/l |
| <b>marker</b>        | Creatinine                                        | mmol/l |
| <b>Inflammation</b>  | Glycoprotein acetyls, mainly a1-acid glycoprotein | mmol/l |
| <b>marker</b>        |                                                   |        |

VLDL: very low density lipoprotein; LDL: low density lipoprotein; IDL: intermediate density lipoprotein; HDL: high density lipoprotein

## Reference

1. Würtz, P. *et al.* Lipoprotein subclass profiling reveals pleiotropy in the genetic variants of lipid risk factors for coronary heart disease: a note on Mendelian randomization studies. *Journal of the American College of Cardiology* vol. 62 1906–1908 (2013).
